# Supplementary material for: Adult Neurogenesis Transiently Generates Oxidative Stress
Source: PLoS One. 2012 Apr 30;7(4):e35264. doi: 10.1371/journal.pone.0035264 (PMC3340368; doi:10.1371/journal.pone.0035264)
Supplement: Table S1 — RT-PCR Primers (DOCX) [file pone.0035264.s006.docx]

**Table S1**

| **Gene Name** | **Primer Sequence** |
| --- | --- |
| Hif1a | F-TGCCAGATCACAGCACATTCA  R-TGACACTACAGCAATGCAATGG |
| Cbx7 | | F-TGGCTGGAGCTTTTCTTTGC | | --- | | R-GGGATTCTGTCCCCCAATATG | |
| Smad5 | | F-CGCCTGTGGGTAGGCAGTAC | | --- | | R-TCTGTGGTTCAGTGCACACTTG | |
| Ebp | | F-GGTGATACCAAGCATCCTTGTG | | --- | | R-CACGCTCTGGGCACTAGTGA | |
| Anxa6 | | F-GTGGCGGAGAGGACTAAAGCT | | --- | | R-AGTTGGCCACTGCTTGGTAGA | |
| Nfe2 | | F-ACAAGGTGGCAGCCCAAA | | --- | | R-CAGCTGCACAATGGTTTCCA | |
| Ncald | | F-GTCCTACAGACGCAGAAAAACAGA | | --- | | R-TCCCCCACCAAGGATGTG | |
| Naf1 | | F-TGTCATGCCCCACTATCCTTTT | | --- | | R-GCGGAAGTGGAAAGTTATGCATA | |
| Fgf13 | | F-CCGGCCGAGGGTGGTA | | --- | | R-CACATGGTTGCCTTTCATGATC | |
| Rab15 | | F-CAGGGAGTCTGGGCTTTGC | | --- | | R-CTACTGGTTTTCAACAGGATTGTCA | |
| Cadps | | F-CCATCCGAAACCGTCTCACT | | --- | | R-GCCCCCACCCTCACTCA | |
| Dhx16 | | F-AAAGTCGGCAAGACACGAGAA | | --- | | R-AGCTGCAAGGTTTGGTCCAT | |
| Pold1 | | F-CCAAGCGCCGCAACTG | | --- | | R-GCTCCTTGATGGTCGATTACG | |
| Araf | | F-CTCCGAACCCTCCTTGCA | | --- | | R-AAGGCAAGCAGGCAACTCA | |
| Wnt2b | | F-CCTCCACTTCAAGCCTCTGACT | | --- | | R-AGGAAGGTGCGCATGCA | |
| Sgk3 | | F-AAAACATATTATGGCTGAACGCAAT | | --- | | R-CCAACCAAAAATGGGTGCTT | |
| Ndufs1 | | F-GCCAAGTGTGTCAAAGCTGTCA | | --- | | R-AGCATATGGACGGCTCCTCTAC | |
| Slc25a15 | | F-GCCCCACGGAGCTTGTG | | --- | | R-TTTCCTGATGTCTCCATTTCATACA | |
| Stat5b | | F-TGGGTTTCGTGAACAAGCAA | | --- | | R-GTCCCGTCTGGCTTGTTGA | |
| Ube2n | F-GAGGTGGAGGTTGAACTCTGGTA  R-TCCTGGCCAACGAAAACAG |
| Bdnf | F-GCCCTGCGGAGGCTAAGT  R-GGATGGCCACTCAGAAATTCC |
| Camk2a | F-TGAGAGGAGATTGGAAGGTGTTTC  R-AAGGCATGCGTCCAAGTAGAA |
| Dcx | F-TTCGTAGTTTTGATGCGTTGCT  R-GAGGCAGGTTAATGTTGTCAGACA |
| Gfap | F-TGACCGCTTTGCTAGCTACATC  R-GCGCCTTGTTTTGCTGTTC |
| Nes | F-GGGAGGATGGAGAATGGACTAGA  R-GATCCTCGTCCCCATGCA |
| Ngfb | F-TTCCAGGCCCATGGTACAA  R-GGTGGATGAGCGCTTGCT |
| Ntf3 | F-GGTGGGCGAGACTGAATGA  R-GGGACGTCGACATGAAGAGAA |
